# Supplementary material
Source: MDPI journal article supplement (https://www.mdpi.com/2076-3417/9/7/1401)
Supplement: s1 [file s1]

# Supplementary Materials: Environmental Pollutants Impair Transcriptional Regulation of the Vitellogenin Gene in the Burrowing Mud Crab (*Macrophthalmus Japonicus*)

Kiyun Park, Hyunbin Jo, Dong-Kyun Kim and Ihn-Sil Kwak

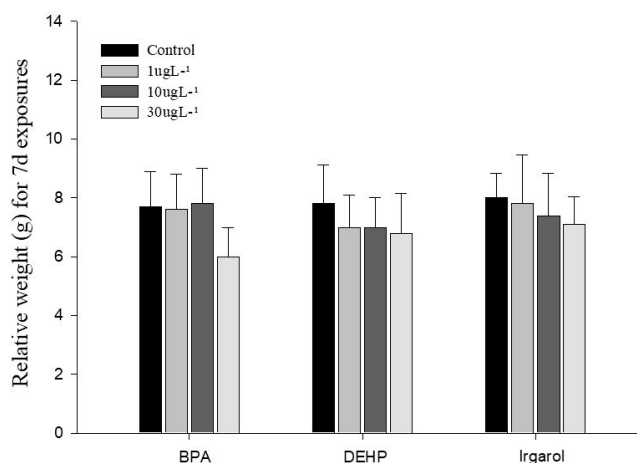

**Figure S1.** The relative weight (g) in *M. japonicus* crabs exposed to each dose of BPA, DEHP, and irgarol for 7 d.

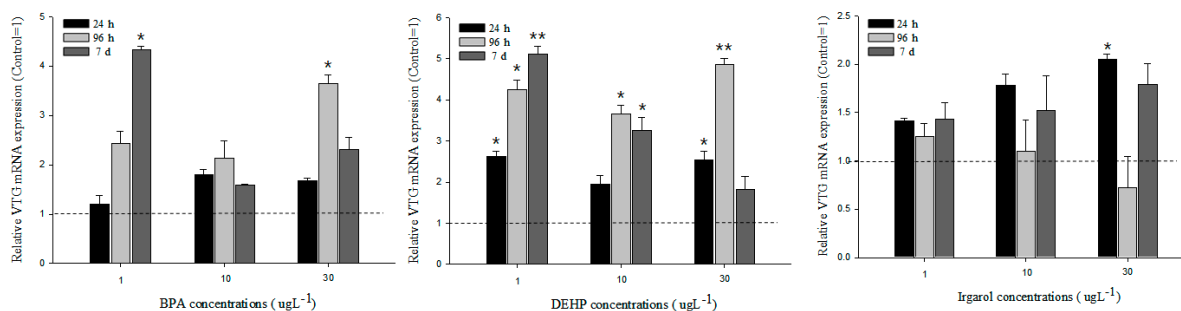

**Figure S2.** Transcriptional expression of VTG gene in *M. japonicus* hepatopancreas exposed to each dose of BPA, DEHP, and irgarol for each exposure period. The values were normalized against GAPDH. Values of each bar represent the mean  $\pm$  SD. A statistically significant difference was presented by an asterisk at \* $P < 0.05$  and \*\* $P < 0.01$  as compared to the control (relative control value of VTG = 1).

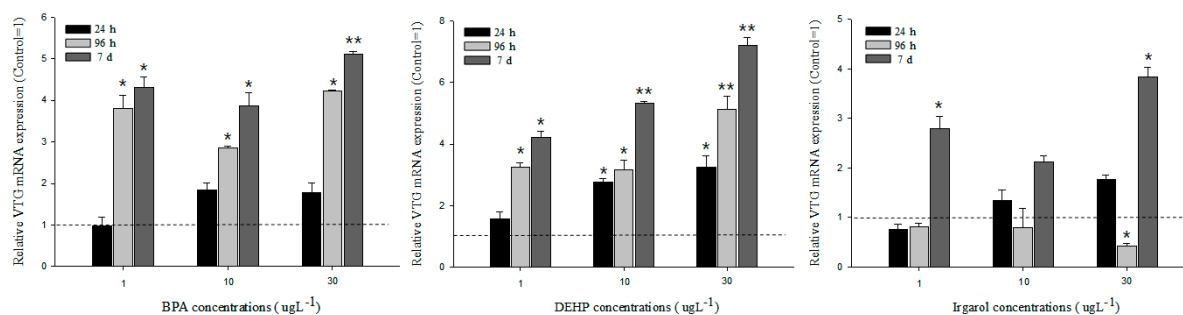

**Figure S3.** Transcriptional expression of VTG gene in *M. japonicus* ovary exposed to each dose of BPA, DEHP, and irgarol for each exposure period. The values were normalized against GAPDH. Values of each bar represent the mean  $\pm$  SD. A statistically significant difference was presented by an asterisk at \* $P < 0.05$  and \*\* $P < 0.01$  as compared to the control (relative control value of VTG = 1).
